# Supplementary material for: Development of an m6A-Related lncRNAs Signature Predicts Tumor Stemness and Prognosis for Low-Grade Glioma Patients
Source: PubMed Central journal article supplement (PMC10791469; doi:10.1155/2024/2062283), 2024-01-09
Supplement: 2062283.f1.pdf [file 2062283.f1.pdf]

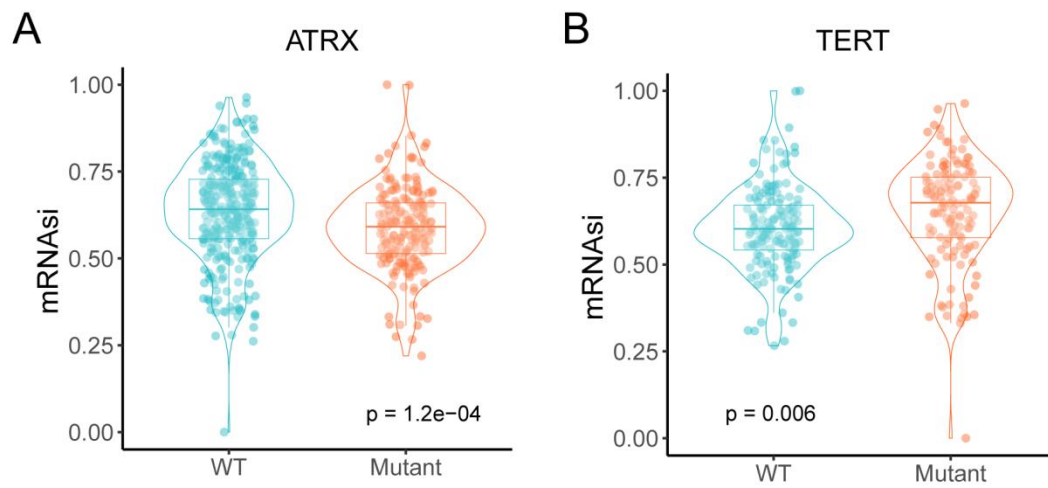

**Figure S1. Violin plots of mRNAasi in TCGA LGG patients classified by (A) ATRX and (B) TERT mutation. Differential analysis between the LGG groups were estimated by the Student's t-test.**

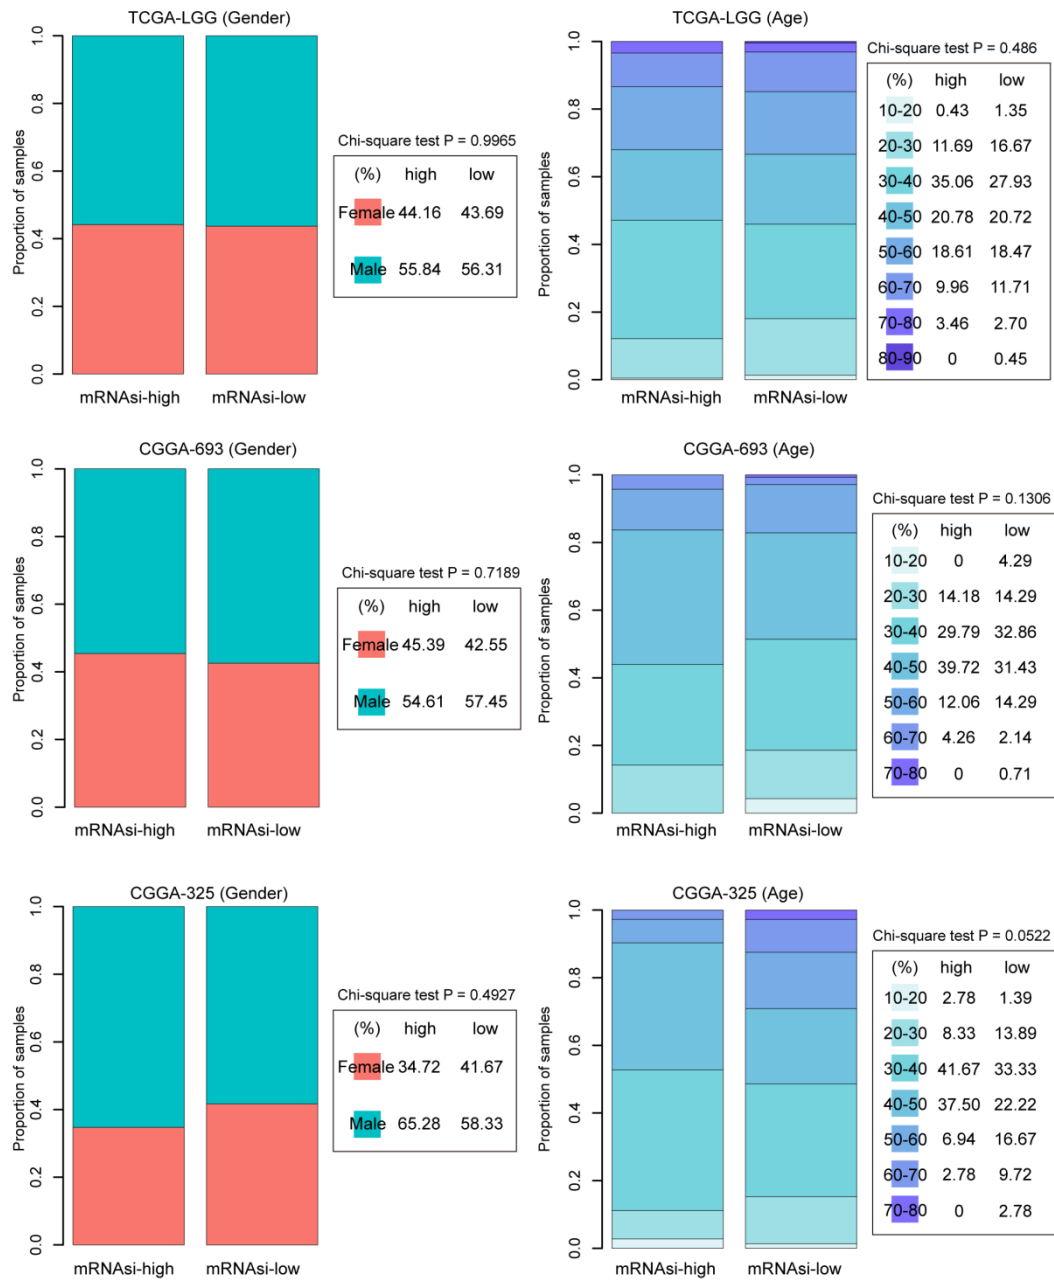

**Figure S2. Gender and age distributions between mRNAi-high and mRNAi low groups in TCGA-LGG, CGGA-693, and CGGA-325 datasets.**

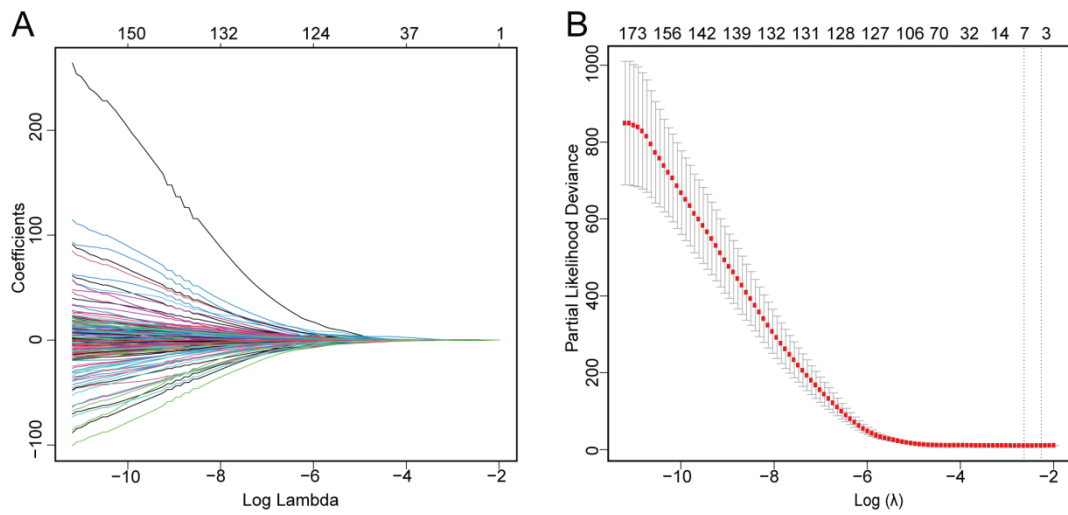

**Figure S3. The least absolute shrinkage and selection operator Cox (LASSO-Cox) analysis for m6A-related lncRNAs.** (A) The coefficients for m6A-related lncRNAs. (B) The best parameter ( $\lambda$ ) was selected based on the LASSO model.

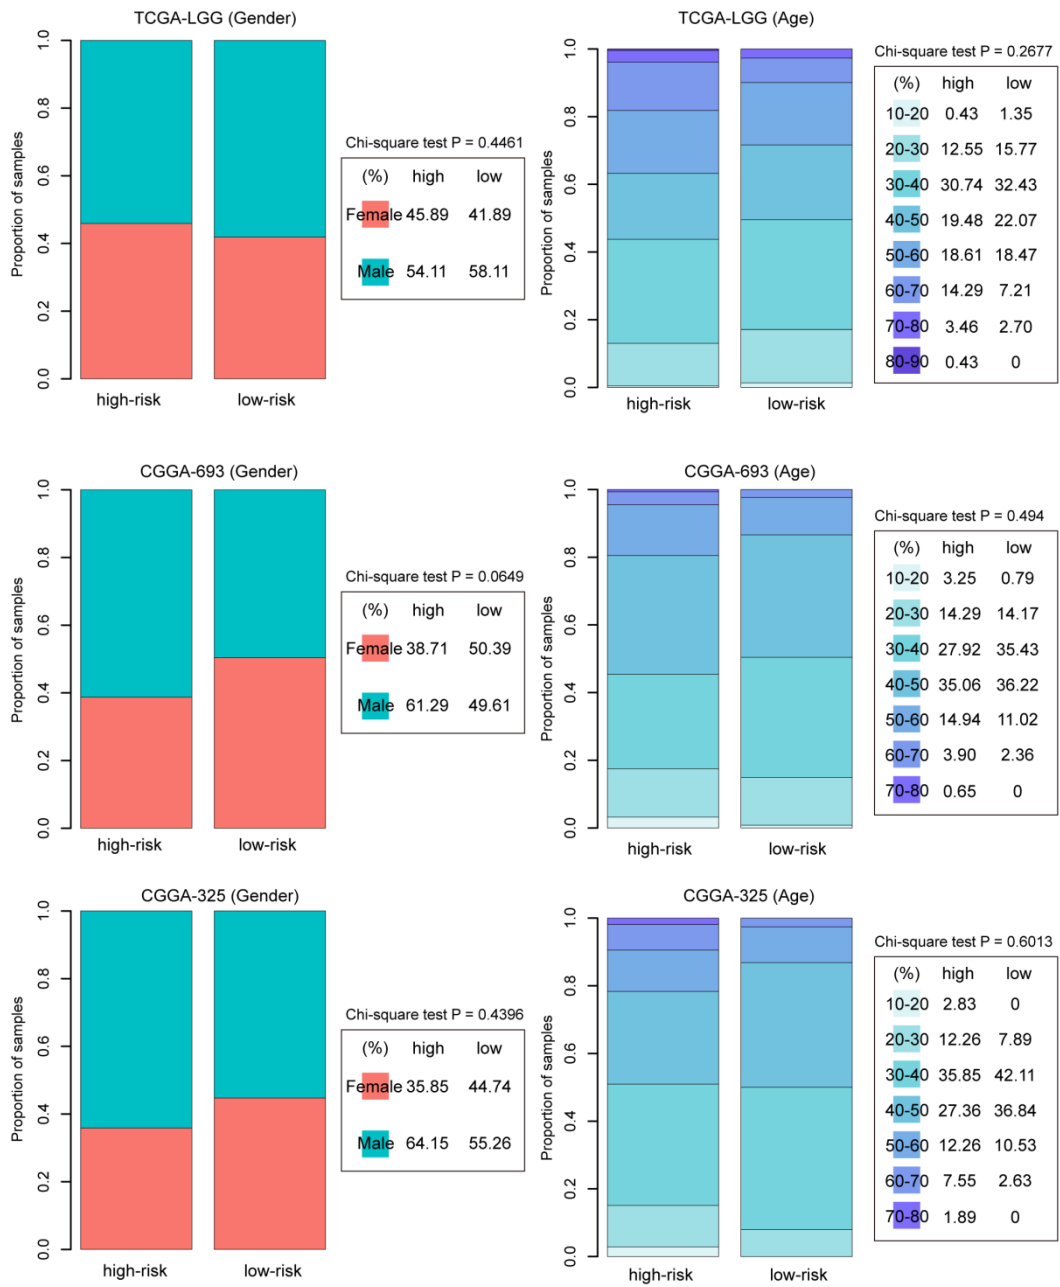

**Figure S4. Gender and age distributions between high-risk and low-risk groups in TCGA-LGG, CGGA-693, and CGGA-325 datasets.**

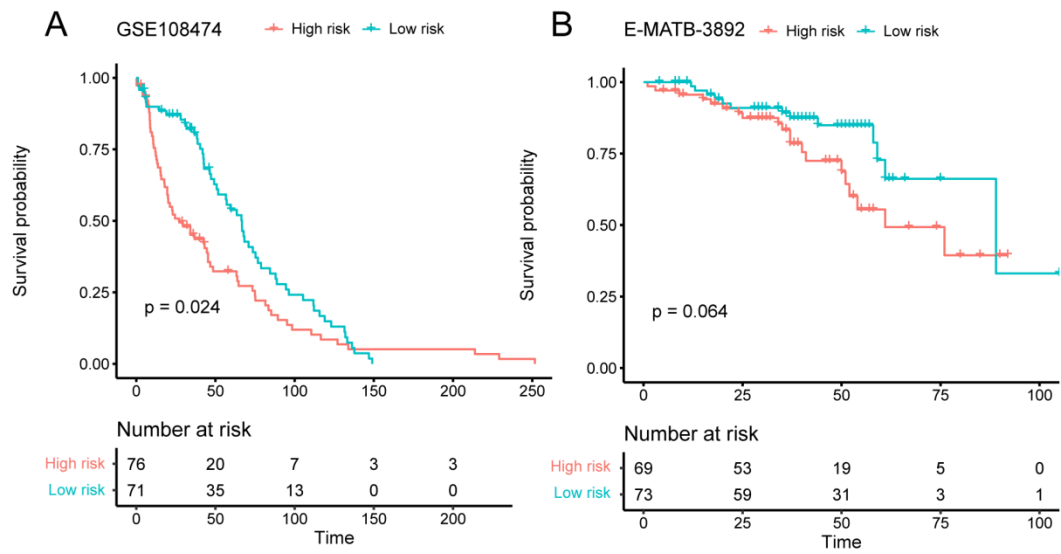

**Figure S5. The performance of risk model in (A) GSE108471 and (B) E-MATB-3892 cohorts.**

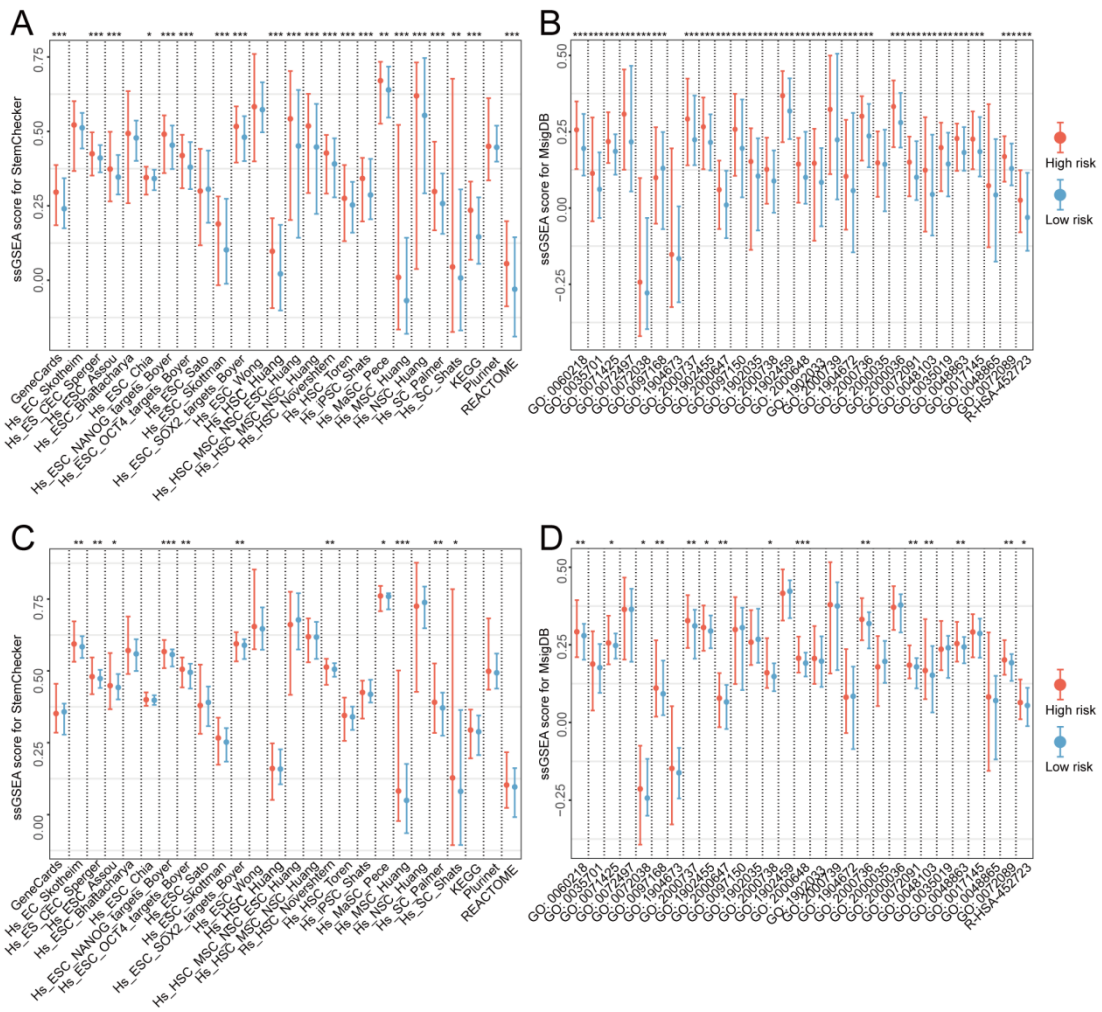

**Figure S6. The differences in stemness scores between high- and low-risk groups of LGG patients.** (A) and (B) Box plots showing the activities of StemChecker and MsigDB stemness categories estimated by ssGSEA in CGGA-693 risk groups. (C) and (D) Box plots showing the activities of StemChecker and MsigDB stemness categories estimated by ssGSEA in CGGA-325 risk groups. \*:  $p < 0.05$ , \*\*:  $p < 0.01$ , \*\*\*:  $p < 0.001$  0.001, and ns for no significant.

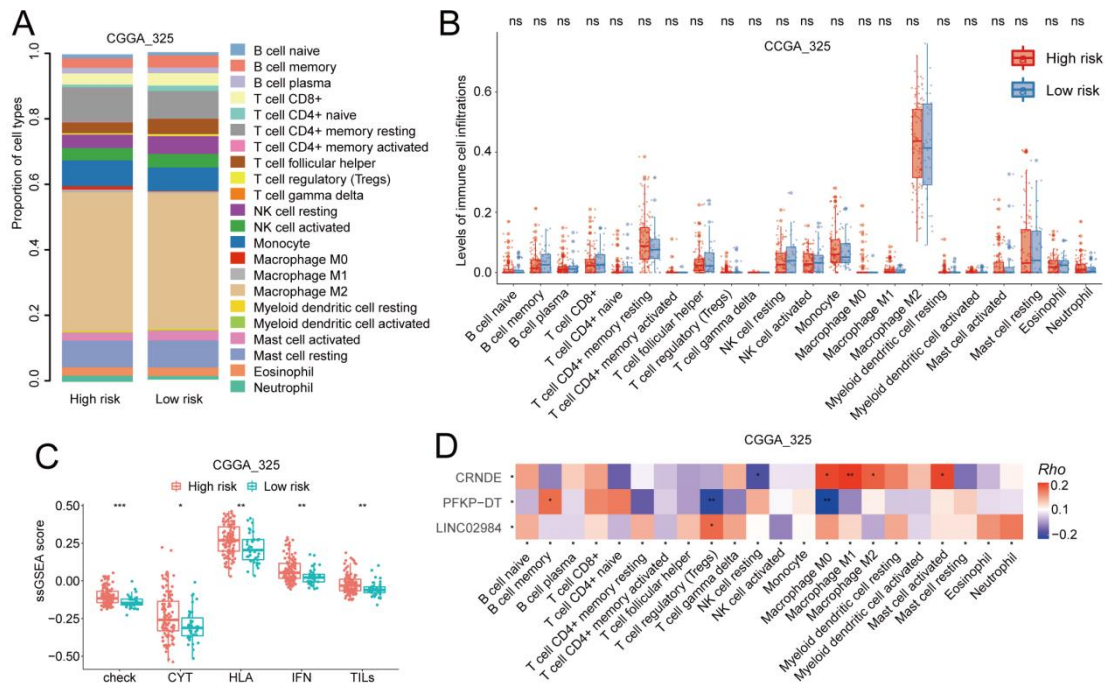

**Figure S7. The TIME pattern and immune signatures of CGGA-325 risk groups.** (A) Bar plots showing the proportion of immune cells in each LGG risk group. (B) Box plots showing the levels of 22 immune cell infiltrations between high- and low-risk groups. (C) The differences of immune signature activities estimated by ssGSEA between LGG risk groups. (D) The correlation between lncRNA expression and immune cell infiltrations. \*:  $p < 0.05$ , \*\*:  $p < 0.01$ , \*\*\*:  $p < 0.001$ , and ns for no significant.

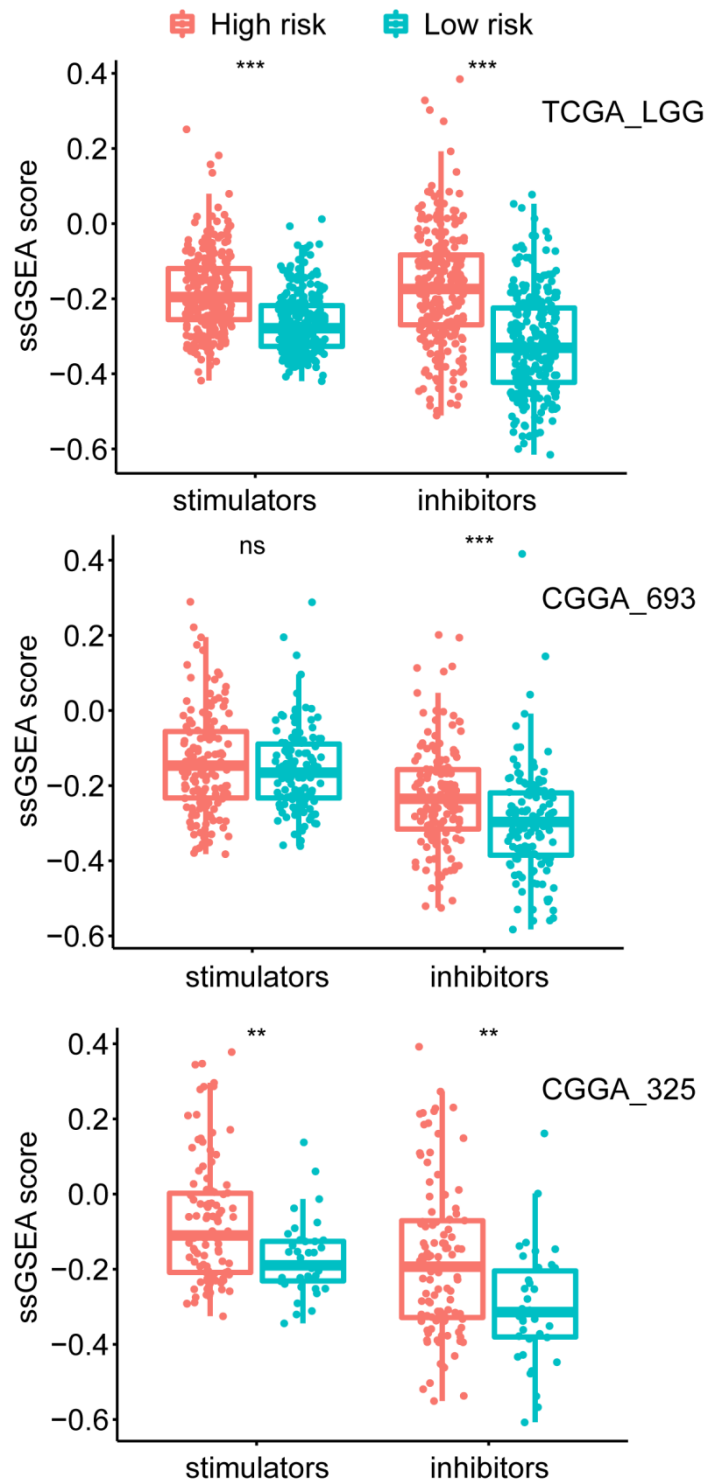

**Figure S8. The differences of activities for immune stimulators and inhibitors in high-risk and low-risk groups from TCGA-LGG, CGGA-693, and CGGA-325 cohorts.**



**Table S1. The characteristic of datasets in this study.**

| <b>Datasets</b> | <b>Sources</b> | <b>Platform</b> | <b>Samples</b> |
|-----------------|----------------|-----------------|----------------|
| TCGA-LGG        | TCGA           | RNA-sequencing  | 511            |
| CGGA-693        | CGGA           | RNA-sequencing  | 282            |
| CGGA-325        | CGGA           | RNA-sequencing  | 144            |
| GSE108474       | GEO            | microarray      | 162            |
| E-MATB-3892     | ArrayExpress   | microarray      | 148            |

**Table S2. Stemness gene sets used in this study.**

| Source      | Catalogue                                                                                    | Numer of genes |
|-------------|----------------------------------------------------------------------------------------------|----------------|
| StemChecker | GeneCards                                                                                    | 133            |
| StemChecker | Hs_EC_Skotheim                                                                               | 152            |
| StemChecker | Hs_ES_CEC_Sperger                                                                            | 653            |
| StemChecker | Hs_ESC_Assou                                                                                 | 1066           |
| StemChecker | Hs_ESC_Bhattacharya                                                                          | 89             |
| StemChecker | Hs_ESC_Chia                                                                                  | 507            |
| StemChecker | Hs_ESC_NANOG_targets_Boyer                                                                   | 984            |
| StemChecker | Hs_ESC_OCT4_targets_Boyer                                                                    | 289            |
| StemChecker | Hs_ESC_Sato                                                                                  | 17             |
| StemChecker | Hs_ESC_Skottman                                                                              | 58             |
| StemChecker | Hs_ESC_SOX2_targets_Boyer                                                                    | 731            |
| StemChecker | Hs_ESC_Wong                                                                                  | 335            |
| StemChecker | Hs_HSC_Huang                                                                                 | 94             |
| StemChecker | Hs_HSC_MSC_NSC_ESC_Huang                                                                     | 18             |
| StemChecker | Hs_HSC_MSC_NSC_Huang                                                                         | 114            |
| StemChecker | Hs_HSC_Novershtern                                                                           | 854            |
| StemChecker | Hs_HSC_Toren                                                                                 | 106            |
| StemChecker | Hs_iPSC_Shats                                                                                | 80             |
| StemChecker | Hs_MaSC_Pece                                                                                 | 306            |
| StemChecker | Hs_MSC_Huang                                                                                 | 59             |
| StemChecker | Hs_NSC_Huang                                                                                 | 54             |
| StemChecker | Hs_SC_Palmer                                                                                 | 184            |
| StemChecker | Hs_SC_Shats                                                                                  | 81             |
| StemChecker | KEGG                                                                                         | 136            |
| StemChecker | Plurinet                                                                                     | 299            |
| StemChecker | REACTOME                                                                                     | 28             |
| MsigDB      | GO:0060218;<br>GOBP_HEMATOPOIETIC_STEM_CELL_DIFFERENTIATION                                  | 35             |
| MsigDB      | GO: 0035701;<br>GOBP_HEMATOPOIETIC_STEM_CELL_MIGRATION                                       | 9              |
| MsigDB      | GO: 0071425;<br>GOBP_HEMATOPOIETIC_STEM_CELL_PROLIFERATION                                   | 35             |
| MsigDB      | GO: 0072497;<br>GOBP_MESENCHYMAL_STEM_CELL_DIFFERENTIATION                                   | 12             |
| MsigDB      | GO: 0072038;<br>GOBP_MESENCHYMAL_STEM_CELL_MAINTENANCE_INVOL<br>VED_IN_NEPHRON_MORPHOGENESIS | 6              |
| MsigDB      | GO: 0097168;<br>GOBP_MESENCHYMAL_STEM_CELL_PROLIFERATION                                     | 8              |
| MsigDB      | GO: 1904673;<br>GOBP_NEGATIVE_REGULATION_OF_SOMATIC_STEM_CELL_                               | 5              |

POPULATION\_MAINTENANCE

|        |                                                                   |    |
|--------|-------------------------------------------------------------------|----|
|        | GO: 2000737 ;                                                     |    |
| MsigDB | GOBP_NEGATIVE_REGULATION_OF_STEM_CELL_DIFFERENTIATION             | 27 |
|        | GO: 1902455;                                                      |    |
| MsigDB | GOBP_NEGATIVE_REGULATION_OF_STEM_CELL_POPULATION_MAINTENANCE      | 26 |
|        | GO: 2000647;                                                      |    |
| MsigDB | GOBP_NEGATIVE_REGULATION_OF_STEM_CELL_PROLIFERATION               | 27 |
|        | GO: 0097150;                                                      |    |
| MsigDB | GOBP_NEURONAL_STEM_CELL_POPULATION_MAINTENANCE                    | 23 |
|        | GO: 1902035;                                                      |    |
| MsigDB | GOBP_POSITIVE_REGULATION_OF_HEMATOPOIETIC_STEM_CELL_PROLIFERATION | 9  |
|        | GO: 2000738;                                                      |    |
| MsigDB | GOBP_POSITIVE_REGULATION_OF_STEM_CELL_DIFFERENTIATION             | 24 |
|        | GO: 1902459;                                                      |    |
| MsigDB | GOBP_POSITIVE_REGULATION_OF_STEM_CELL_POPULATION_MAINTENANCE      | 47 |
|        | GO: 2000648;                                                      |    |
| MsigDB | GOBP_POSITIVE_REGULATION_OF_STEM_CELL_PROLIFERATION               | 55 |
|        | GO: 1902033 ;                                                     |    |
| MsigDB | GOBP_REGULATION_OF_HEMATOPOIETIC_STEM_CELL_PROLIFERATION          | 16 |
|        | GO: 2000739;                                                      |    |
| MsigDB | GOBP_REGULATION_OF_MESENCHYMAL_STEM_CELL_DIFFERENTIATION          | 8  |
|        | GO: 1904672;                                                      |    |
| MsigDB | GOBP_REGULATION_OF_SOMATIC_STEM_CELL_POPULATION_MAINTENANCE       | 11 |
|        | GO: 2000736;                                                      |    |
| MsigDB | GOBP_REGULATION_OF_STEM_CELL_DIFFERENTIATION                      | 83 |
|        | GO: 2000035;                                                      |    |
| MsigDB | GOBP_REGULATION_OF_STEM_CELL_DIVISION                             | 12 |
|        | GO: 2000036;                                                      |    |
| MsigDB | GOBP_REGULATION_OF_STEM_CELL_POPULATION_MAINTENANCE               | 71 |
|        | GO: 0072091;                                                      |    |
| MsigDB | GOBP_REGULATION_OF_STEM_CELL_PROLIFERATION                        | 92 |
| MsigDB | GO: 0048103; GOBP_SOMATIC_STEM_CELL_DIVISION                      | 12 |

|        |                                                                                    |     |
|--------|------------------------------------------------------------------------------------|-----|
| MsigDB | GO: 0035019;<br>GOBP_SOMATIC_STEM_CELL_POPULATION_MAINTENANCE                      | 67  |
| MsigDB | GO: 0048863; GOBP_STEM_CELL_DIFFERENTIATION                                        | 249 |
| MsigDB | GO: 0017145; GOBP_STEM_CELL_DIVISION                                               | 31  |
| MsigDB | GO: 0048865; GOBP_STEM_CELL_FATE_COMMITMENT                                        | 10  |
| MsigDB | GO: 0072089; GOBP_STEM_CELL_PROLIFERATION                                          | 124 |
| MsigDB | R-HSA-452723;<br>REACTOME_TRANSCRIPTIONAL_REGULATION_OF_PLURIPOT<br>ENT_STEM_CELLS | 31  |

---
